# Supplementary material for: Production of microalgal external organic matter in a Chlorella-dominated culture: influence of temperature and stress factors
Source: Royal Society of Chemistry journal article supplement (doi:10.1039/d0ew00176g), 2020-01-01
Supplement: d0ew00176g1.pdf [file d0ew00176g1.pdf]

## APPENDIX A

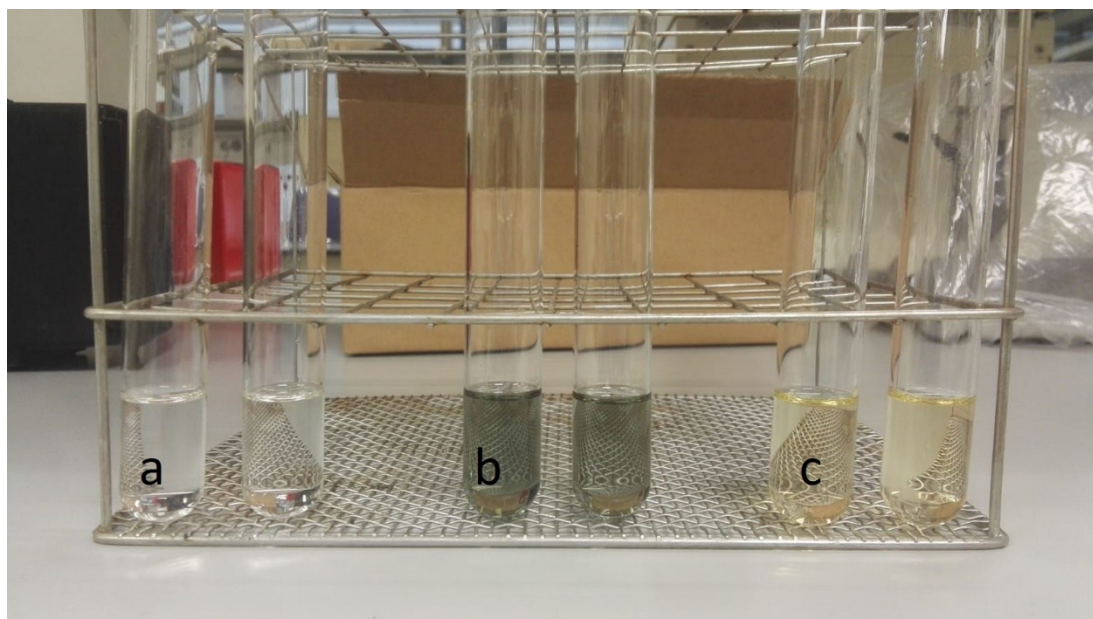

*Figure A.1: The phenol/sulphuric acid method applied to samples with and without nitrite: a) blanks, b) sample with 5 mg NO<sub>2</sub>-NL<sup>-1</sup>, c) negligible nitrite concentration.*
