# Supplementary material for: Production of microalgal external organic matter in a Chlorella-dominated culture: influence of temperature and stress factors
Source: Royal Society of Chemistry journal article supplement (doi:10.1039/d0ew00176g), 2020-01-01
Supplement: d0ew00176g2.pdf [file d0ew00176g2.pdf]

## APPENDIX A

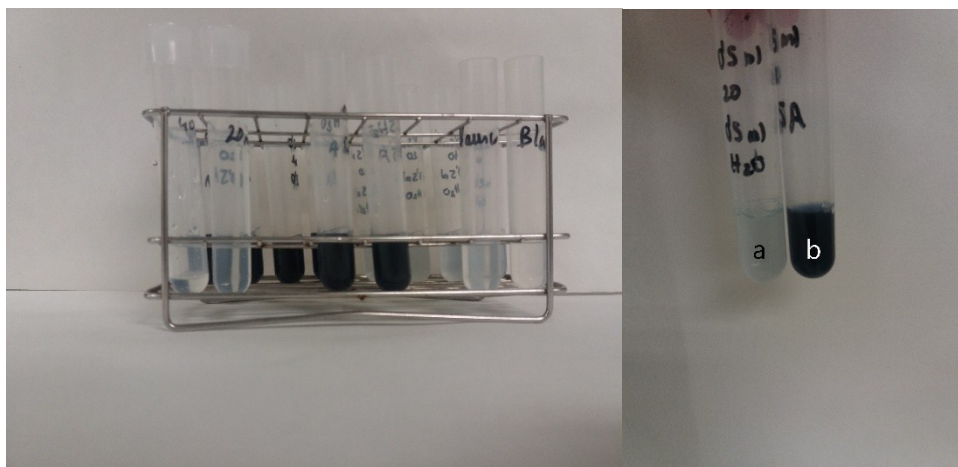

*Figure A.2: Lowry method modified by Peterson applied to: a) samples without allylthiourea (ATU); b) samples with ATU.*
