# Supplementary material for: Production of microalgal external organic matter in a Chlorella-dominated culture: influence of temperature and stress factors
Source: Royal Society of Chemistry journal article supplement (doi:10.1039/d0ew00176g), 2020-01-01
Supplement: d0ew00176g3.pdf [file d0ew00176g3.pdf]

## APPENDIX A

Table A.1: AnMBR effluent (microalgae substrate) characteristics

| Parameter          | Unit                                  | Mean $\pm$ SD  | n  |
|--------------------|---------------------------------------|----------------|----|
| NH <sub>4</sub> -N | mg N·L <sup>-1</sup>                  | 47.1 $\pm$ 7.2 | 16 |
| NO <sub>2</sub> -N | mg N·L <sup>-1</sup>                  | 0.9 $\pm$ 0.8  | 16 |
| NO <sub>3</sub> -N | mg N·L <sup>-1</sup>                  | 4.5 $\pm$ 2.5  | 16 |
| PO <sub>4</sub> -P | mg P·L <sup>-1</sup>                  | 5.2 $\pm$ 0.6  | 16 |
| N:P                | molar ratio                           | 20.1 $\pm$ 1.7 | 16 |
| COD                | mg COD·L <sup>-1</sup>                | 76 $\pm$ 9     | 5  |
| BOD                | mg O <sub>2</sub> ·L <sup>-1</sup>    | 29 $\pm$ 4     | 5  |
| Alk                | mg CaCO <sub>3</sub> ·L <sup>-1</sup> | 613 $\pm$ 36   | 5  |
| VFA                | mg COD·L <sup>-1</sup>                | 1.4 $\pm$ 0.9  | 5  |
| SO <sub>4</sub>    | mg SO <sub>4</sub> ·L <sup>-1</sup>   | 40.9 $\pm$ 3.9 | 5  |
| H <sub>2</sub> S   | mg S·L <sup>-1</sup>                  | 75 $\pm$ 6     | 5  |
| Turbidity          | NTU                                   | 52 $\pm$ 36    | 16 |

NH<sub>4</sub>-N: ammonium; NO<sub>2</sub>-N: nitrite; NO<sub>3</sub>-N: nitrate; PO<sub>4</sub>-P: phosphate; N:P: nitrogen:phosphorus ratio; COD: chemical oxygen demand; BOD: biochemical oxygen demand; Alk: alkalinity; VFA: volatile fatty acids; SO<sub>4</sub>: sulphate; H<sub>2</sub>S: Sulphide.
