# Supplementary material for: Production of microalgal external organic matter in a Chlorella-dominated culture: influence of temperature and stress factors
Source: Royal Society of Chemistry journal article supplement (doi:10.1039/d0ew00176g), 2020-01-01
Supplement: d0ew00176g5.pdf [file d0ew00176g5.pdf]

## APPENDIX A

Table A.3: Operating conditions of the lab-scale experiments.

|               | Operating mode | NH <sub>4</sub> -Ni (mg N·L <sup>-1</sup> ) | PO <sub>4</sub> -Pi (mg P·L <sup>-1</sup> ) | Temperature (°C) |     | Nitrification |     |
|---------------|----------------|---------------------------------------------|---------------------------------------------|------------------|-----|---------------|-----|
|               |                |                                             |                                             | R-A (control)    | R-B | R-A           | R-B |
| <b>Exp. 1</b> | B              | 22.5                                        | 1.9                                         | 25               | 30  | II            | II  |
| <b>Exp. 2</b> | C              | 37.6                                        | 2.5                                         | 25               | 30  | II            | II  |
| <b>Exp. 3</b> | C              | 56.4                                        | 3.7                                         | 25               | 35  | II            | II  |
| <b>Exp. 4</b> | C              | 40.7                                        | 1.8                                         | 25               | 35* | II            | II  |
| <b>Exp. 5</b> | C              | 56.7                                        | 1.6                                         | 25               | 25  | I             | NI  |

*B: Batch; C: Continuous; I: Nitrification inhibition by adding 10 mg·L<sup>-1</sup> of allylthiourea; II: Nitrification inhibition in the inoculum, i.e. 5 mg·L<sup>-1</sup> of allylthiourea in the inoculum; NI: Nitrification non-inhibited.*

*\*Only during 4 hours a day*
