# Supplementary material for: Production of microalgal external organic matter in a Chlorella-dominated culture: influence of temperature and stress factors
Source: Royal Society of Chemistry journal article supplement (doi:10.1039/d0ew00176g), 2020-01-01
Supplement: d0ew00176g6.pdf [file d0ew00176g6.pdf]

## APPENDIX A

Table A.4. Average values obtained during continuous operation of the MPBR plant  
(mean  $\pm$  standard deviation (number of samples)).

|                                                                   | Period A             | Period B             |
|-------------------------------------------------------------------|----------------------|----------------------|
| Days                                                              | 16                   | 18                   |
| Temperature ( $^{\circ}\text{C}$ )                                | 20.7 $\pm$ 2.1 (16)  | 17.2 $\pm$ 1.3 (18)  |
| Solar PAR ( $\mu\text{mol}\cdot\text{m}^{-2}\cdot\text{s}^{-1}$ ) | 351 $\pm$ 103 (16)   | 275 $\pm$ 104 (18)   |
| EOM <sub>POL</sub> ( $\text{mg}\cdot\text{L}^{-1}$ )              | 23.6 $\pm$ 7.2 (12)  | 22.5 $\pm$ 7.6 (15)  |
| EOM <sub>P</sub> ( $\text{mg}\cdot\text{L}^{-1}$ )                | 17.2 $\pm$ 2.1 (12)  | 19.9 $\pm$ 2.7 (15)  |
| EOM <sub>POL</sub> ( $\text{mg}\cdot\text{g TSS}^{-1}$ )          | 64.8 $\pm$ 31.1 (12) | 50.9 $\pm$ 18.3 (15) |
| EOM <sub>P</sub> ( $\text{mg}\cdot\text{g TSS}^{-1}$ )            | 45.5 $\pm$ 12.0 (12) | 43.1 $\pm$ 3.1 (15)  |
| N-NH <sub>4</sub> ( $\text{mg N}\cdot\text{L}^{-1}$ )             | 13.6 $\pm$ 7.5 (7)   | 15.5 $\pm$ 8.6 (10)  |
| P-PO <sub>4</sub> ( $\text{mg P}\cdot\text{L}^{-1}$ )             | 1.5 $\pm$ 0.9 (7)    | 1.2 $\pm$ 1.1 (10)   |
| NRR ( $\text{mg N}\cdot\text{L}^{-1}\cdot\text{d}^{-1}$ )         | 25.7 $\pm$ 7.2 (7)   | 20.8 $\pm$ 8.7 (9)   |
| PRR ( $\text{mg P}\cdot\text{L}^{-1}\cdot\text{d}^{-1}$ )         | 3.1 $\pm$ 1.2 (7)    | 2.9 $\pm$ 1.0 (9)    |
| BP ( $\text{mg TSS}\cdot\text{L}^{-1}\cdot\text{d}^{-1}$ )        | 200 $\pm$ 58 (7)     | 231 $\pm$ 124 (10)   |
| NOxR ( $\text{mg N}\cdot\text{L}^{-1}\cdot\text{d}^{-1}$ )        | 3.2 $\pm$ 3.0 (7)    | 4.2 $\pm$ 2.5 (9)    |
| TMP (mbar)                                                        | 128 $\pm$ 38 (3763)  | 20 $\pm$ 11 (2395)   |
| FR ( $\text{mbar}\cdot\text{min}^{-1}$ )                          | 7 $\pm$ 2 (3670)     | 2 $\pm$ 2 (2380)     |
| TSS ( $\text{mg TSS}\cdot\text{L}^{-1}$ )                         | 479 $\pm$ 56 (7)     | 423 $\pm$ 151 (9)    |

BP: biomass productivity; EOM<sub>P</sub>: proteins of external organic matter; EOM<sub>POL</sub>: polysaccharides of external organic matter; NOxR: nitrification rate; NRR: nitrogen recovery rate; PAR: photosynthetically active radiation; PRR: phosphorus recovery rate; TSS: total suspended solids.
